# Supplementary material for: Viability of Glioblastoma Cells and Fibroblasts in the Presence of Imidazole-Containing Compounds
Source: MDPI journal article supplement (doi:10.3390/ijms23105834), 2022-05-23
Supplement: s1 [file s1]

## Supplement S1

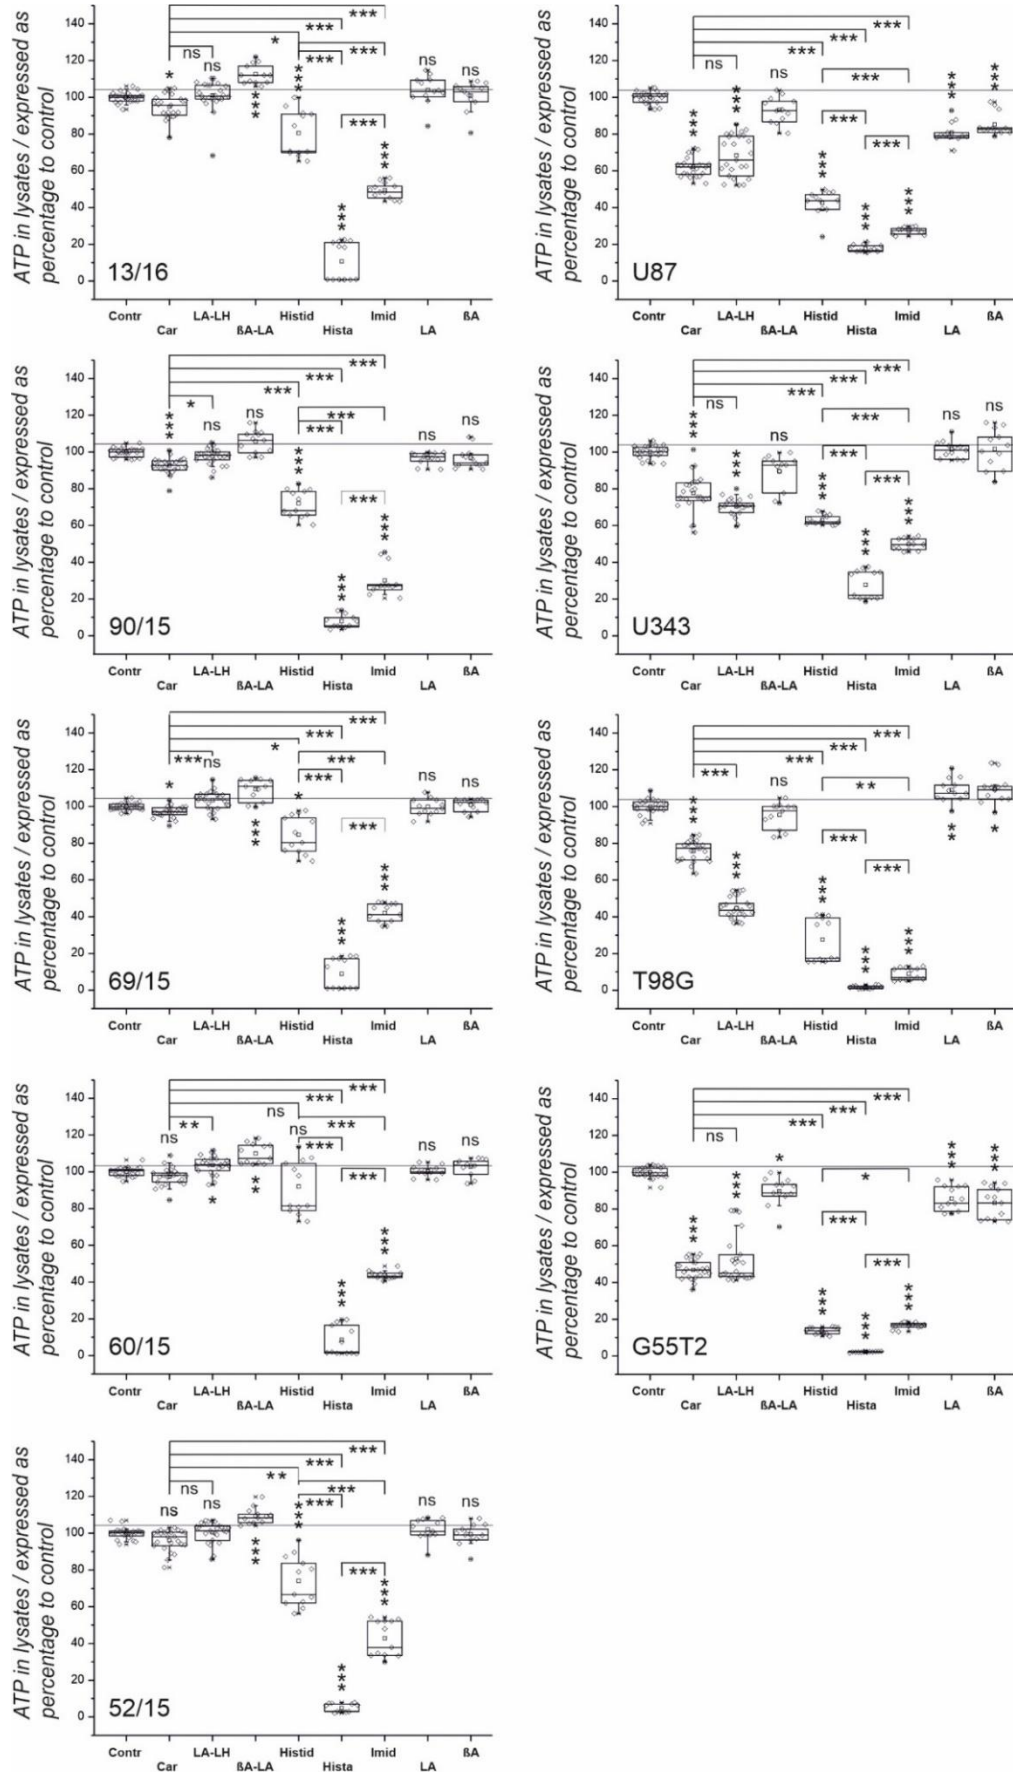

(a)

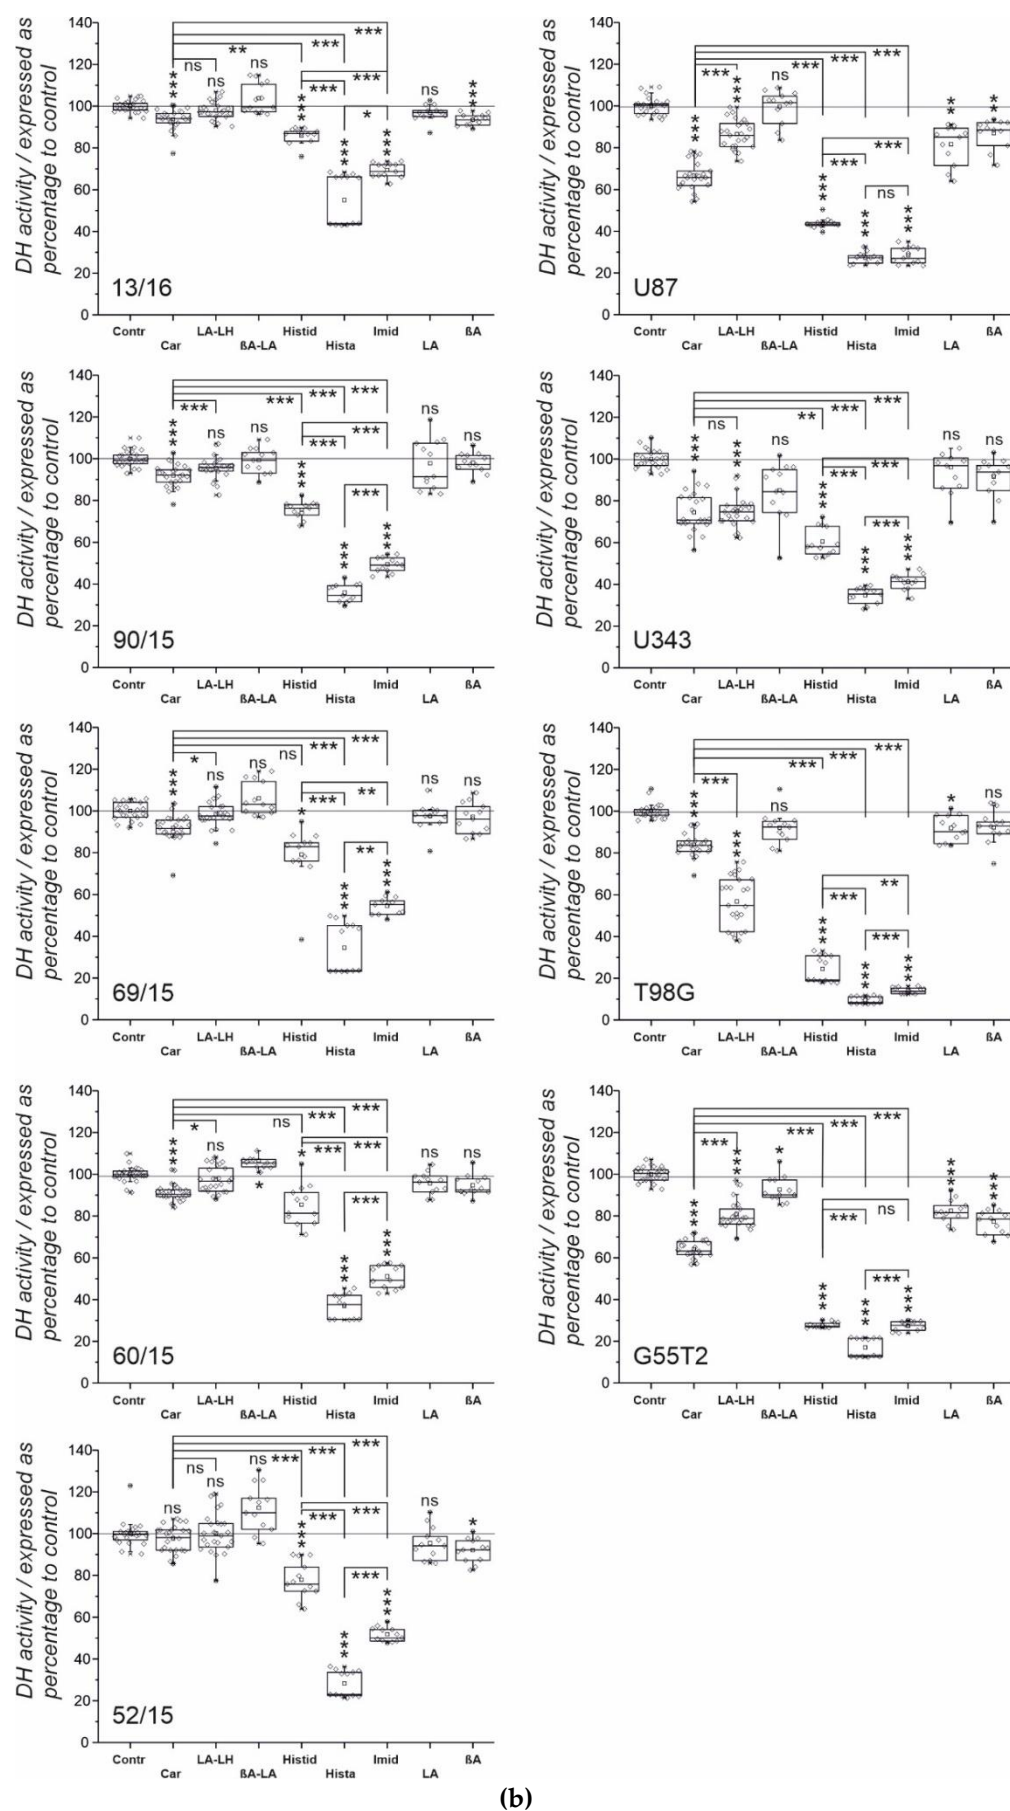

(b)

**Figure S1.** Viability of cells from four glioblastoma and from five fibroblasts cultures derived from patients, cultivated in the presence of imidazole-containing compounds. Patient-derived fibroblast cell cultures (13/16, 90/15, 69/15, 60/15, 52/15) and glioblastoma cell lines (U87, T98G, U87, G55T2)

were incubated for 48 hours in the presence of carnosine (Car), L-alanyl-L-histidine (LA-LH),  $\beta$ -alanyl-L-alanyl ( $\beta$ A-LA), L-histidine (Histid), histamine (Hista), imidazole (Imid), L-alanine (LA) and  $\beta$ -alanine ( $\beta$ A) (all 50 mM). Cell viability was determined measuring the amount of ATP in cell lysates (**a**) and dehydrogenase (DH) activity in living cells (**b**). Results are presented as box-plots. Statistical analysis was performed using a one-way ANOVA after testing for normality of distribution (Kolmogorov-Smirnov test) and dependent on testing for equality of variances (Levene's test) using a Games-Howell or Bonferroni post hoc test. The level of significance between different compounds is indicated by horizontal lines and compared to Contr above the boxes: \*:  $p < 0.05$ ; \*\*:  $p < 0.005$ ; \*\*\*:  $p < 0.0005$ ; ns: not significant.
